# Supplementary material for: Growth Factors Upregulated by Uric Acid Affect Guanine Deaminase-Induced Melanogenesis
Source: PubMed Central journal article supplement — Biomol Ther (Seoul). 2022 Dec 22;31(1):89–96. doi: 10.4062/biomolther.2022.137 (PMC9810452; doi:10.4062/biomolther.2022.137), 2022-12-22
Supplement: bt-31-1-89-supple.pdf [file bt-31-1-89-supple.pdf]

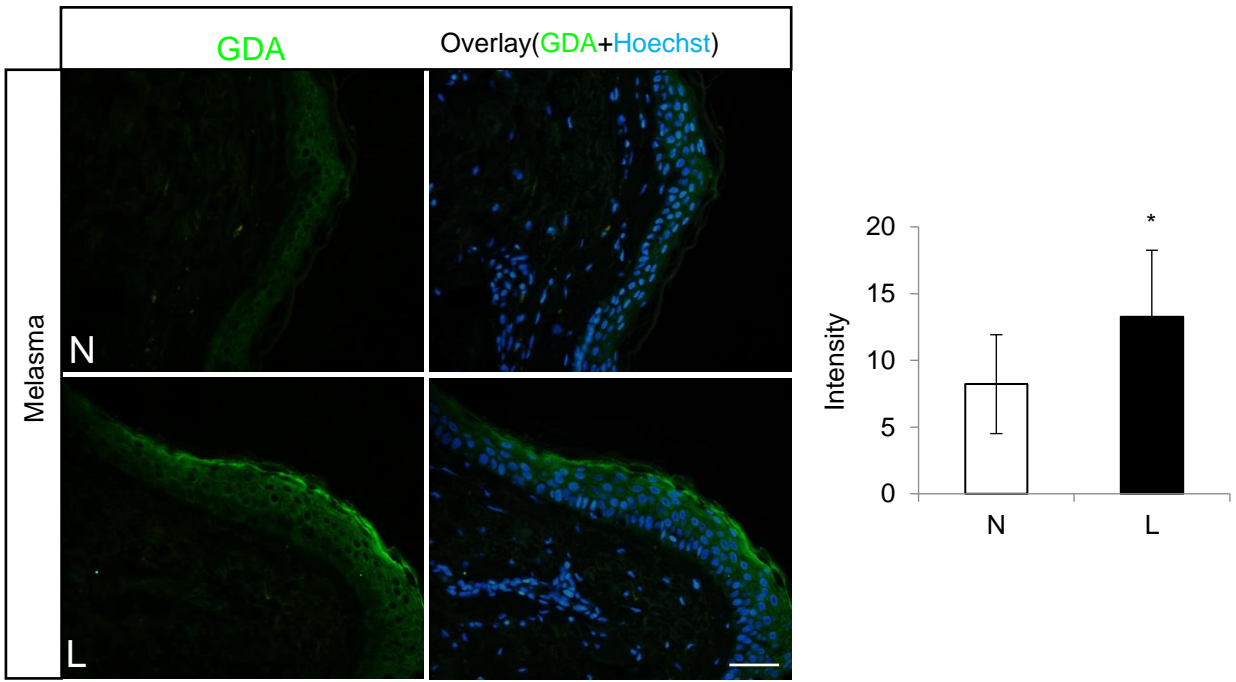

### Supplementary Figure 1. Upregulation of GDA in melasma.

Representative immunofluorescence staining with anti-GDA antibody in lesional skin samples (L) compared to that in non-lesional skin samples (N) from five patients with melasma. Nuclei were counter-stained with Hoechst 33258. Intensities of immunofluorescence staining were measured using a Wright Cell Imaging Facility ImageJ software. \* $P < 0.05$  vs. non-lesional skin samples.
